# Supplementary material for: Computational Biomarker Pipeline from Discovery to Clinical Implementation: Plasma Proteomic Biomarkers for Cardiac Transplantation
Source: PLOS journal article supplement (doi:10.1371/journal.pcbi.1002963), 2013-04-04
Supplement: S9 (10.1371/journal.pcbi.1002963.s009) [file journal.pcbi.1002963.s009]

| <b>Characteristics</b>                              | <b>Acute rejection</b> | <b>Non-rejection</b> |
|-----------------------------------------------------|------------------------|----------------------|
| Subjects                                            | 17                     | 27                   |
| Mean age (SD)                                       | 51 (13)                | 53 (14)              |
| Female                                              | 6 (35%)                | 3 (11%)              |
| Male                                                | 11 (65%)               | 24 (89%)             |
| <b>Ethnicity</b>                                    |                        |                      |
| Caucasian                                           | 17 (100%)              | 24 (89%)             |
| Asian                                               | 0 (0%)                 | 1 (4%)               |
| Other                                               | 0 (0%)                 | 2 (7%)               |
| <b>Primary disease</b>                              |                        |                      |
| Cardiomyopathy - Ischemic (Coronary Artery Disease) | 7 (41%)                | 13 (48%)             |
| Cardiomyopathy - Idiopathic Dilated                 | 3 (18%)                | 2 (7%)               |
| Cardiomyopathy - Dilated                            | 5 (29%)                | 6 (22%)              |
| Cardiomyopathy - Hypertrophic                       | 1 (6%)                 | 0 (0%)               |
| Congenital heart disease                            | 0 (0%)                 | 3 (11%)              |
| Cardiogenic shock                                   | 0 (0%)                 | 3 (11%)              |
| Other                                               | 1 (6%)                 | 0 (0%)               |
